# Supplementary material
Source: Royal Society of Chemistry journal article supplement (doi:10.1039/d6dt00429f)
Supplement: d6dt00429f1.pdf [file d6dt00429f1.pdf]

## Supporting Information (SI)

### **Dual-sensitized luminescent Eu(III) dosimeter for selective detection of inorganic phosphate *via* ligand displacement mechanism**

Nitin Shukla<sup>a</sup>, Juhi Sayala<sup>a</sup>, Zafar Abbas<sup>a</sup>, Ashis K. Patra<sup>a\*</sup>

<sup>a</sup>Department of Chemistry, Indian Institute of Technology Kanpur, Kanpur 208016, Uttar Pradesh, India

E-mail: [akpatra@iitk.ac.in](mailto:akpatra@iitk.ac.in)

| <b>Table of Contents</b>                                                                                                                                | <b>pg #</b> |
|---------------------------------------------------------------------------------------------------------------------------------------------------------|-------------|
| <b>Figure S1:</b> $^1\text{H}$ and $^{13}\text{C}$ NMR of $\text{L}^{\text{N4}}$ ligand.                                                                | <b>4</b>    |
| <b>Figure S2:</b> ESI-MS spectral data and isotopic distribution pattern of $\text{L}^{\text{N4}}$ .                                                    | <b>5</b>    |
| <b>Figure S3:</b> ESI-MS spectral data and isotopic distribution pattern of $[\text{Eu}(\text{TFNB})_2(\text{L}^{\text{N4}})](\text{OTf})$ .            | <b>6</b>    |
| <b>Figure S4:</b> $^1\text{H}$ NMR for the $[\text{La}(\text{TFNB})_2(\text{L}^{\text{N4}})](\text{OTf})$ ( <b>La.1</b> ) complex.                      | <b>7</b>    |
| <b>Figure S5:</b> ESI-MS spectral data and isotopic distribution pattern of <b>La.1</b> .                                                               | <b>8</b>    |
| <b>Figure S6:</b> FT-IR spectra of the $\text{L}^{\text{N4}}$ , HTFNB and <b>Eu.1</b> .                                                                 | <b>9</b>    |
| <b>Figure S7:</b> TGA plot of <b>Eu.1</b> .                                                                                                             | <b>10</b>   |
| <b>Figure S8:</b> Electronic absorption spectra of the $\text{L}^{\text{N4}}$ , HTFNB and <b>Eu.1</b> .                                                 | <b>11</b>   |
| <b>Figure S9:</b> Excitation, emission and luminescence decay profile (lifetime) for <b>Eu.1</b> .                                                      | <b>12</b>   |
| <b>Figure S10:</b> Absorption & PL spectra of <b>Eu.1</b> with increasing concentration of $[\text{TBA}^+][\text{HSO}_4^-]$ .                           | <b>13</b>   |
| <b>Figure S11:</b> Photographic view of <b>Eu.1</b> via naked eye under UV (365 nm) with increasing concentration of $[\text{TBA}^+][\text{HSO}_4^-]$ . | <b>13</b>   |
| <b>Figure S12:</b> Absorption and PL spectra of <b>Eu.1</b> with increasing concentration of $[\text{TBA}^+][\text{CN}^-]$ .                            | <b>14</b>   |
| <b>Figure S13:</b> Photographic view of <b>Eu.1</b> via naked eye under UV (365 nm) with increasing concentration of $[\text{TBA}^+][\text{CN}^-]$ .    | <b>14</b>   |
| <b>Figure S14:</b> Absorption and PL spectra of <b>Eu.1</b> with increasing concentration of $[\text{TBA}^+][\text{F}^-]$ .                             | <b>15</b>   |
| <b>Figure S15:</b> Photographic view of <b>Eu.1</b> via naked eye under UV (365 nm) with increasing concentration of $[\text{TBA}^+][\text{F}^-]$ .     | <b>15</b>   |
| <b>Figure S16:</b> Absorption and PL spectra of <b>Eu.1</b> with increasing concentration of $[\text{TBA}^+][\text{NO}_3^-]$ .                          | <b>16</b>   |
| <b>Figure S17:</b> Photographic view of <b>Eu.1</b> via naked eye under UV (365 nm) with increasing concentration of $[\text{TBA}^+][\text{NO}_3^-]$ .  | <b>16</b>   |
| <b>Figure S18:</b> Absorption and PL spectra of <b>Eu.1</b> with increasing concentration of $[\text{TBA}^+][\text{Cl}^-]$ .                            | <b>17</b>   |

|                                                                                                                                                                                                                                                                                                                                   |           |
|-----------------------------------------------------------------------------------------------------------------------------------------------------------------------------------------------------------------------------------------------------------------------------------------------------------------------------------|-----------|
| <b>Figure S19:</b> Photographic view of <b>Eu.1</b> via naked eye under UV (365 nm) with the increasing concentration of [TBA <sup>+</sup> ][Cl <sup>-</sup> ].                                                                                                                                                                   | <b>17</b> |
| <b>Figure S20:</b> Absorption and PL spectra of <b>Eu.1</b> with increasing concentration of [TBA <sup>+</sup> ][Br <sup>-</sup> ].                                                                                                                                                                                               | <b>18</b> |
| <b>Figure S21:</b> Photographic view of <b>Eu.1</b> via naked eye under UV (365 nm) with increasing concentration of [TBA <sup>+</sup> ][Br <sup>-</sup> ].                                                                                                                                                                       | <b>18</b> |
| <b>Figure S22:</b> Absorption and PL spectra of <b>Eu.1</b> with increasing concentration of [TBA <sup>+</sup> ][I <sup>-</sup> ].                                                                                                                                                                                                | <b>19</b> |
| <b>Figure S23:</b> Photographic view of <b>Eu.1</b> via naked eye under UV (365 nm) with increasing concentration of [TBA <sup>+</sup> ][I <sup>-</sup> ].                                                                                                                                                                        | <b>19</b> |
| <b>Figure S24:</b> Emission spectra depicting the sensitivity of complex <b>Eu.1</b> against the different analyte (lactate, bicarbonate and citrate).                                                                                                                                                                            | <b>20</b> |
| <b>Figure S25:</b> Emission spectra depicting the sensitivity of complex <b>Eu.1</b> against the different analyte (CH <sub>3</sub> COONa and TBASCN).                                                                                                                                                                            | <b>21</b> |
| <b>Figure S26:</b> Change in emission spectra of <b>Eu.1</b> (2.5 μM) on continuous addition of (a) NaH <sub>2</sub> PO <sub>4</sub> (b) Na <sub>2</sub> HPO <sub>4</sub> (c) Na <sub>3</sub> PO <sub>4</sub> (0-10 μM) and nucleotide phosphates, (d) GMP (0-60 μM) (e) AMP (0-40 μM) as representative physiological phosphates | <b>22</b> |
| <b>Figure S27:</b> Emission spectra depicting the sensitivity of complex <b>Eu.1</b> against the different physiologically relevant metal ions.                                                                                                                                                                                   | <b>23</b> |
| <b>Figure S28:</b> Bar plot representing the emission intensity at 615 nm from <b>Eu.1</b> on addition of different metal ions.                                                                                                                                                                                                   | <b>24</b> |
| <b>Figure S29:</b> LOD plot and calculations for phosphate using <b>Eu.1</b> complex.                                                                                                                                                                                                                                             | <b>25</b> |
| <b>Figure S30:</b> DFT-optimized molecular structures of <b>Eu.1</b> bound to phosphate in different orientation (after dissociation of L <sup>N4</sup> ).                                                                                                                                                                        | <b>26</b> |
| <b>Figure S31:</b> Quantum yield calculations                                                                                                                                                                                                                                                                                     | <b>27</b> |

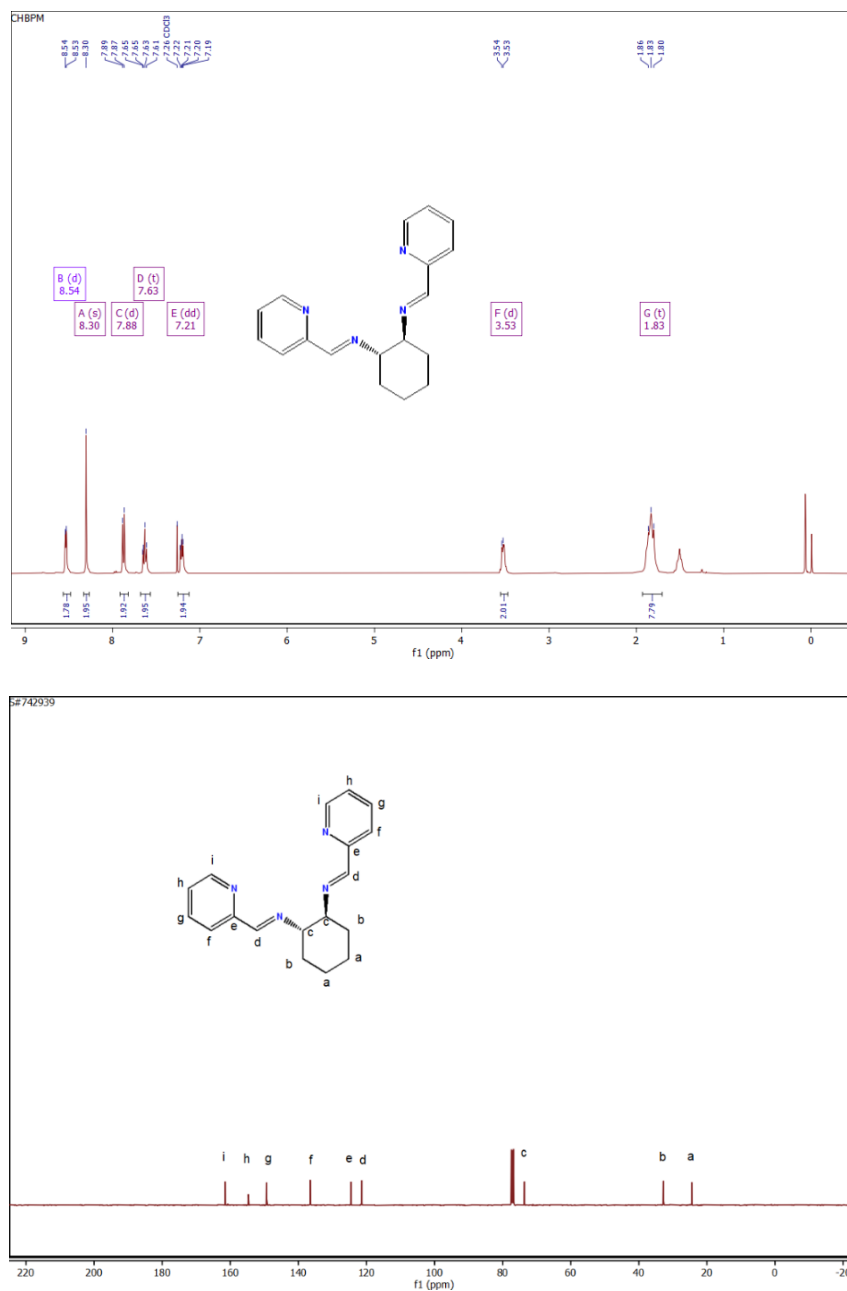

**Fig. S1**  $^1\text{H}$  and  $^{13}\text{C}$  NMR spectra of  $L^{N4}$  ligand recorded in  $\text{CDCl}_3$  in 400 MHz at 298K.

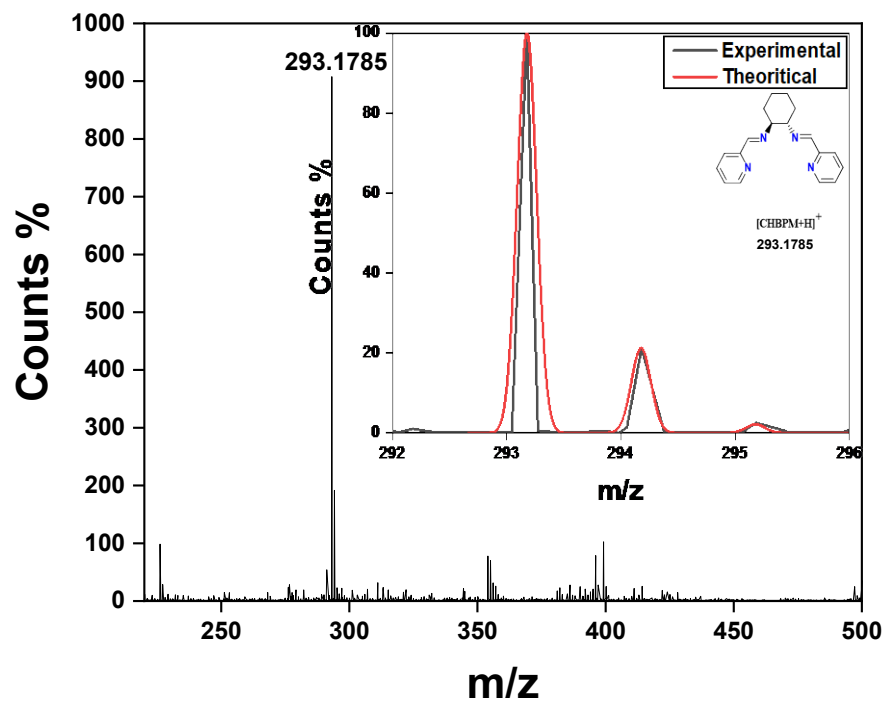

**Fig. S2** ESI-MS spectra of the  $L^{N4}$  in  $CHCl_3$  showing observed molecular ion peak as  $[M+H]^+$  at  $m/z$  293.1785. Inset shows the Experimental isotopic modeling (Black) with a matching theoretically predicted isotopic distribution profile (Red).

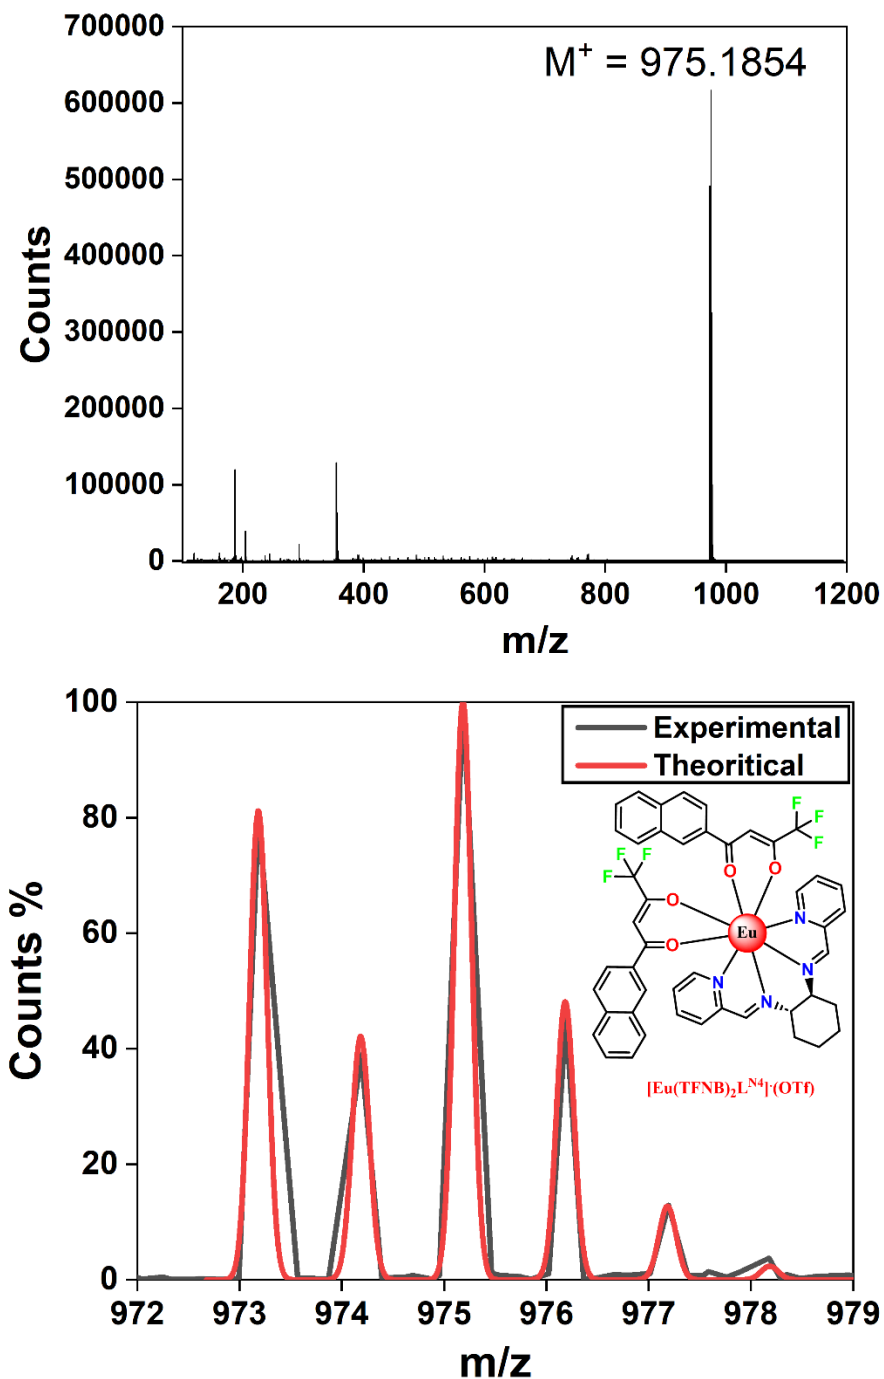

**Fig. S3** ESI-MS spectra of the  $[\text{Eu}(\text{TFNB})_2\text{L}^{\text{N}4}](\text{OTf})$  (**Eu.1**) in MeCN showing observed molecular ion peak as  $[\text{M}]^+$  at  $m/z$  975.1854 (black) with matching theoretically predicted isotopic distribution profile (red).

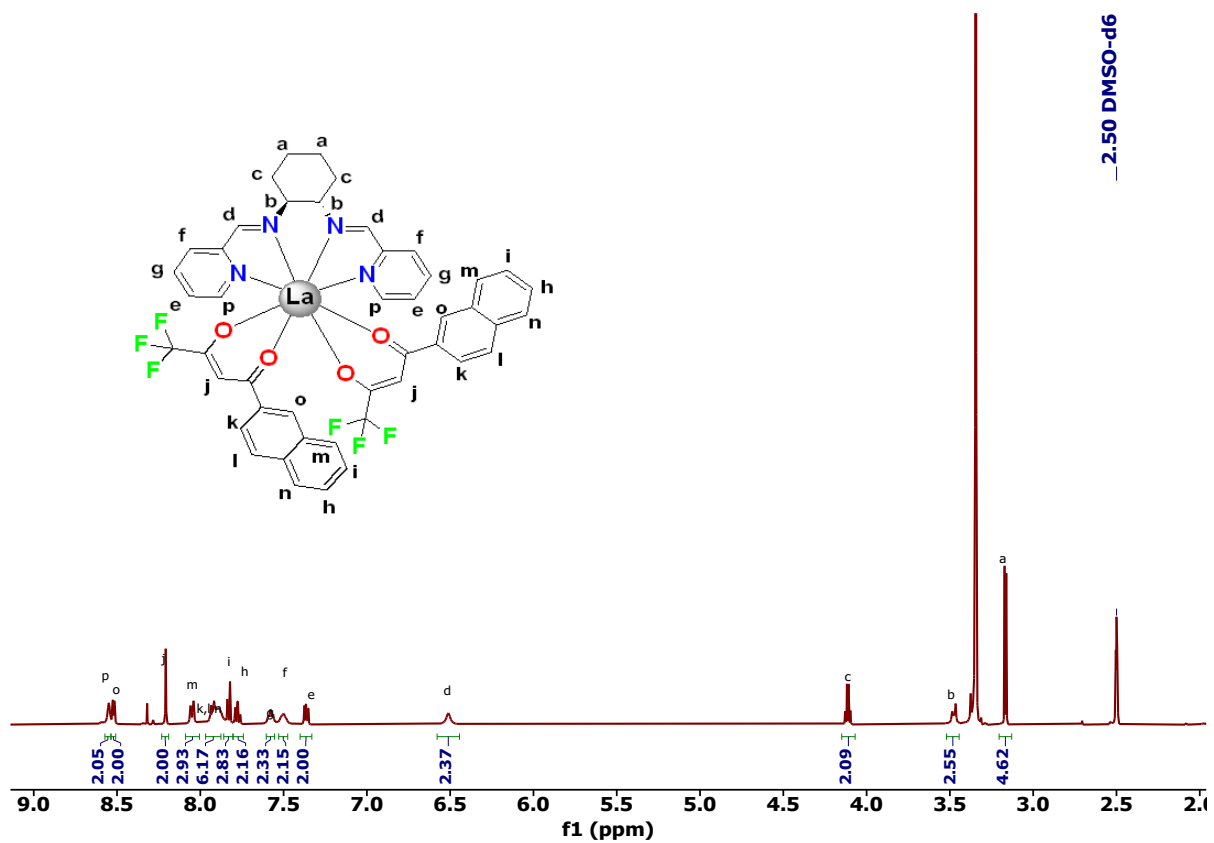

**Fig. S4**  $^1\text{H}$  NMR for **La.1**, a diamagnetic homologous lanthanide complex for solution state speciation in  $\text{DMSO-d}_6$  in 400 MHz at 298 K.

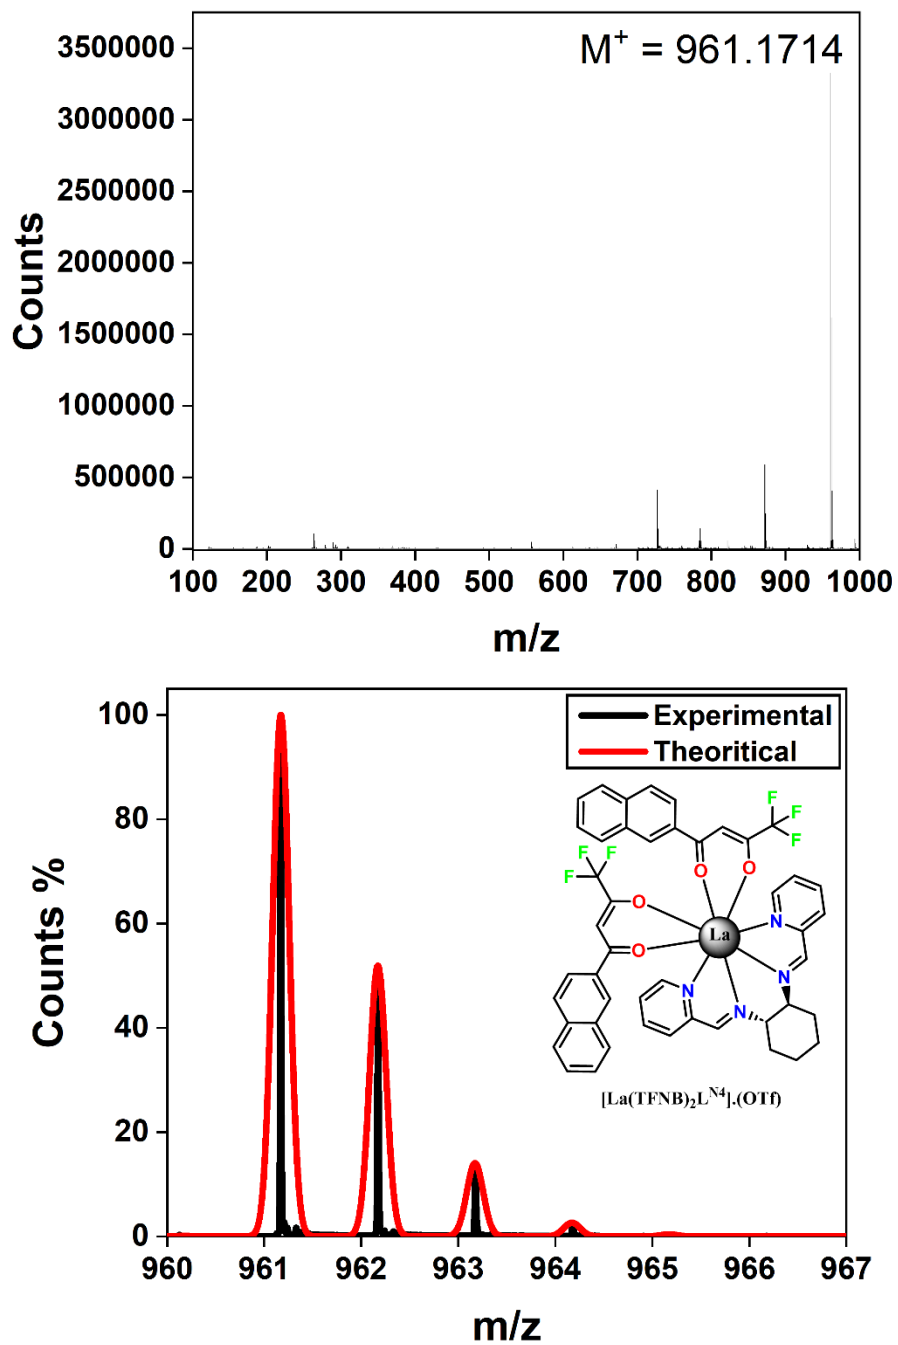

**Fig. S5** ESI-MS spectra of the  $[La(TFNB)_2L^{N4}](OTf)$  (**La.1**) in MeCN showing observed molecular ion peak as  $[M]^+$  at  $m/z$  961.1714 (black) with matching theoretically predicted isotopic distribution profile (red).

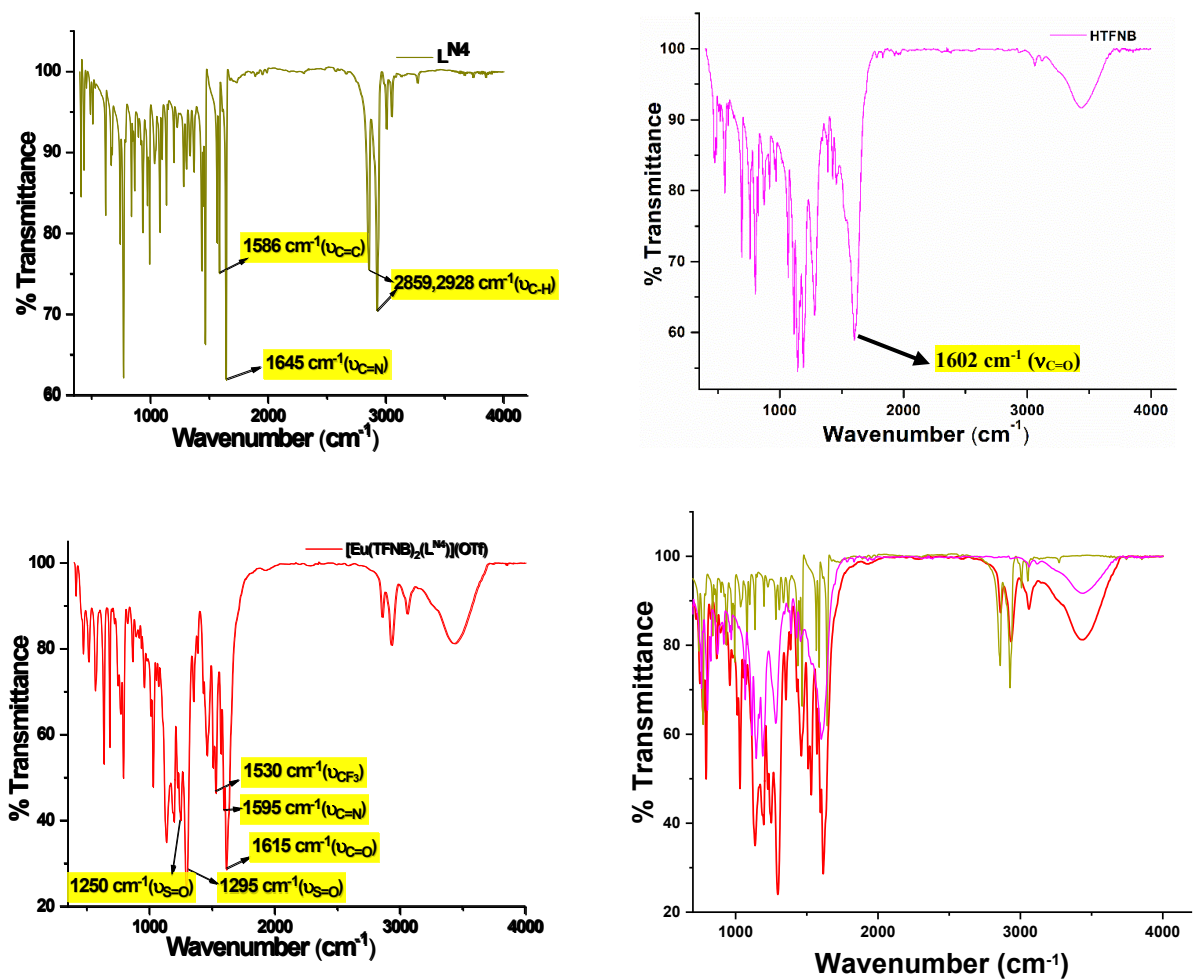

**Fig. S6** FT-IR spectra of the (a) L<sup>N4</sup> Ligand; (b) HTFNB antenna (anion, neutralized using equiv. moles of NaOH); (c) **Eu.1**; (d) merged spectra with vibration bands in the fingerprint regions in solid states (KBr pellets).

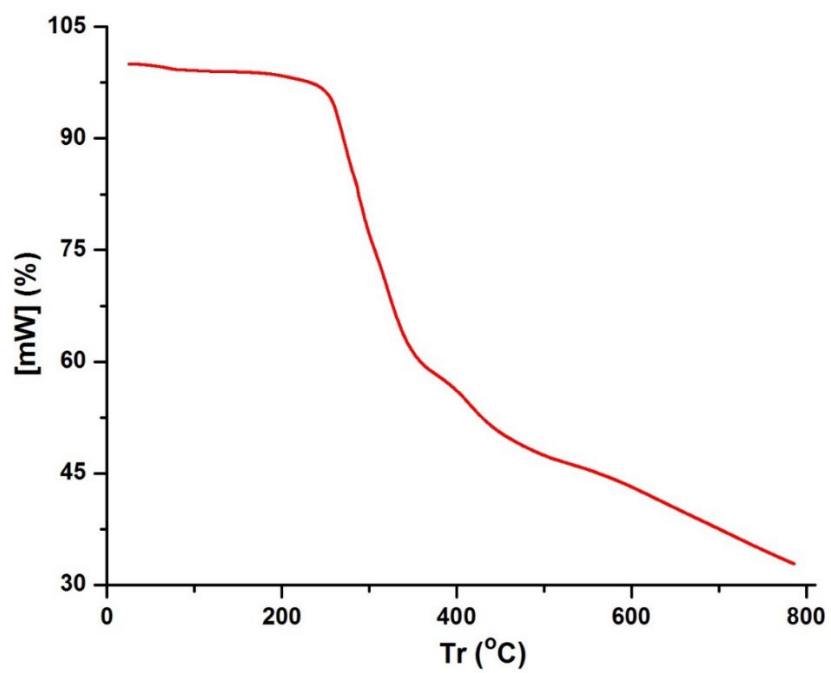

**Fig. S7** TGA of complex **Eu.1** showing the stability of complex till 250°C after which there is an approx. 40% loss of mass owing to dissociation of ligand L<sup>N4</sup>.

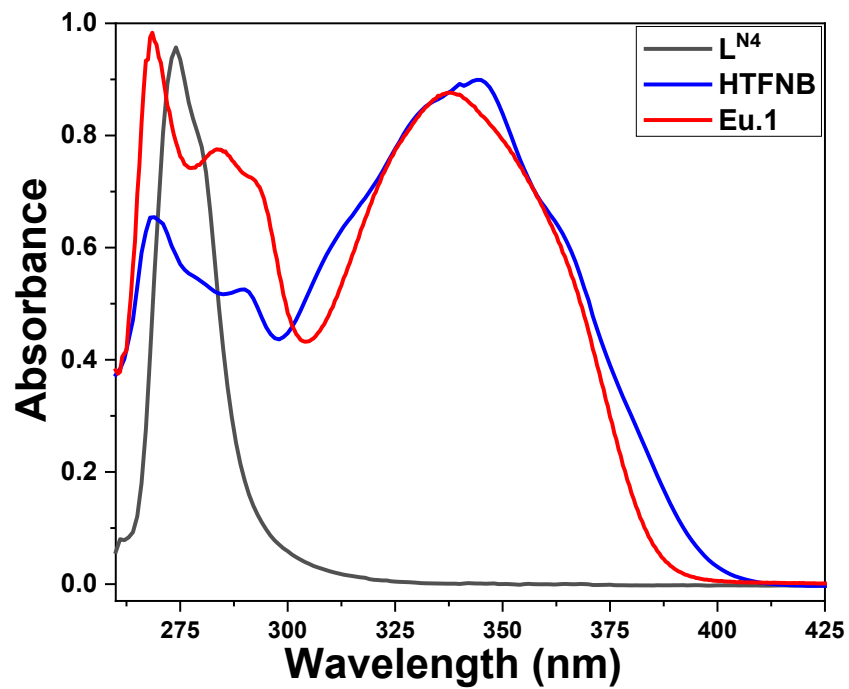

**Fig. S8** Electronic absorption spectra of the ligands L<sup>N4</sup> [7.5  $\mu$ M] (**Black**), HTFNB [7.5  $\mu$ M] (**blue**) and Eu.1 complex [15  $\mu$ M] (**Red**), in MeCN at 298 K (All spectra are normalized).

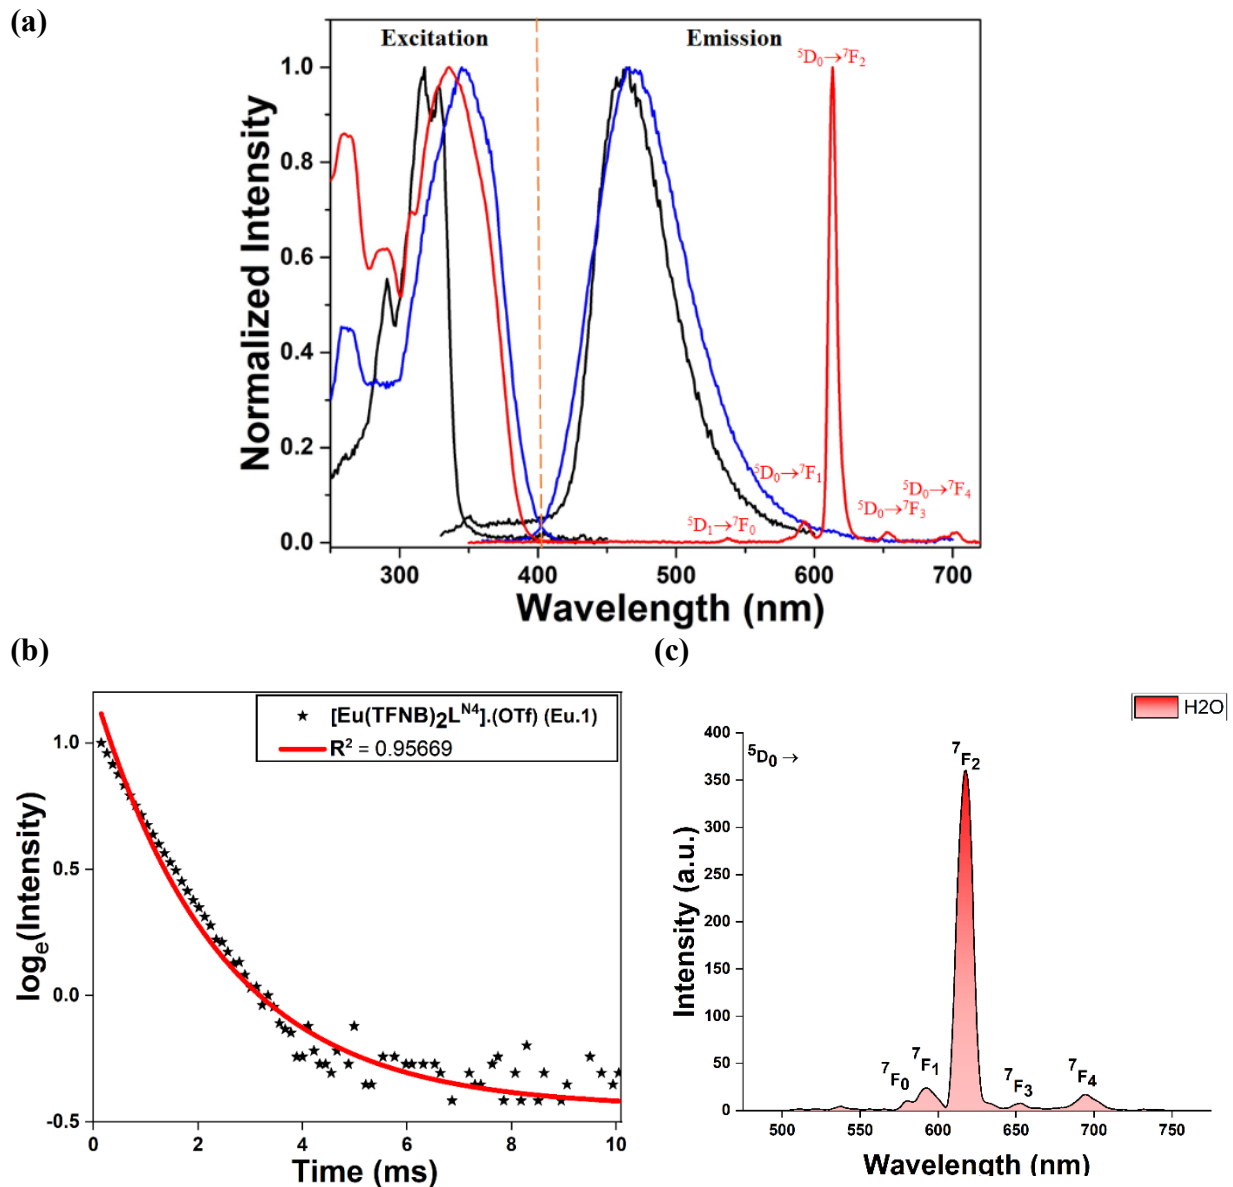

**Fig. S9** (a) Excitation spectra of **Eu.1** complex and ligands (L<sup>N4</sup> (10 μM) (black), HTFNB (20 μM) (blue) and [Eu(TFNB)<sub>2</sub>L<sup>N4</sup>](OTf) (10 μM) (red)) recorded at λ<sub>em</sub>=470 nm for the ligands and λ<sub>em</sub> = 613 nm (<sup>5</sup>D<sub>0</sub>→<sup>7</sup>F<sub>2</sub>) for the complex and their respective photoluminescence spectra (λ<sub>ex</sub> = 275 nm for L<sup>N4</sup>, 344 nm for HTFNB and 340 nm for complex **Eu.1**). (b) Luminescence decay profile of <sup>5</sup>D<sub>0</sub>→<sup>7</sup>F<sub>2</sub> (lifetime measurements) for **Eu.1** in MeCN, λ<sub>ex</sub> = 340 nm and λ<sub>em</sub> = 613 nm with delay time and gate time = 0.5 ms, total decay time = 10.0 ms, Ex. and Em. Slit width = 5 nm each at 298 K. (c) Emission from **Eu.1** recorded in MeCN:Water–75:25 (v/v), delay time and gate time = 0.5 ms and Em. Slit width = 5 nm each at 298 K.

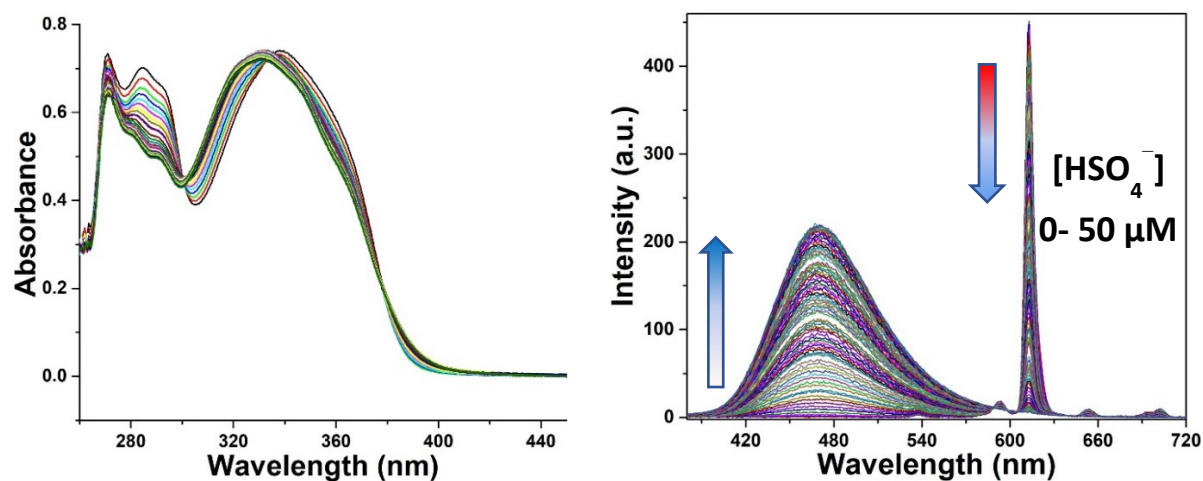

**Fig. S10** Change in absorption spectra (a) and in the PL spectra (b) of **Eu.1** (2.5  $\mu\text{M}$ ) in MeCN with the increasing concentration of  $[\text{HSO}_4^-]$  in  $\text{H}_2\text{O}$  (0-50  $\mu\text{M}$ ) observed at characteristic emission bands of Eu(III) ion ( ${}^5D_0 \rightarrow {}^7F_{J=0,1,2,3,4}$ ),  $\lambda_{\text{ex}} = 340 \text{ nm}$ , ex. and em. slit width 5 nm.

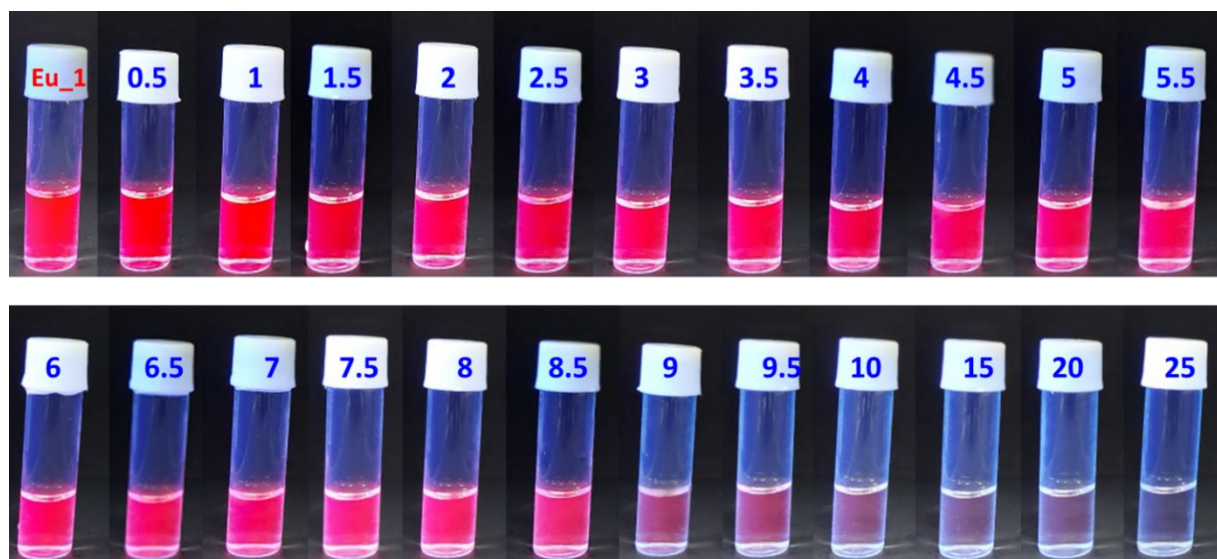

**Fig. S11** Change in the emission of **Eu.1** (10  $\mu\text{M}$ ) in MeCN with the increasing concentration of  $[\text{HSO}_4^-]$  in  $\text{H}_2\text{O}$  (0-250  $\mu\text{M}$ , 0-25 equiv.) as seen from the naked eye under UV light (365 nm).

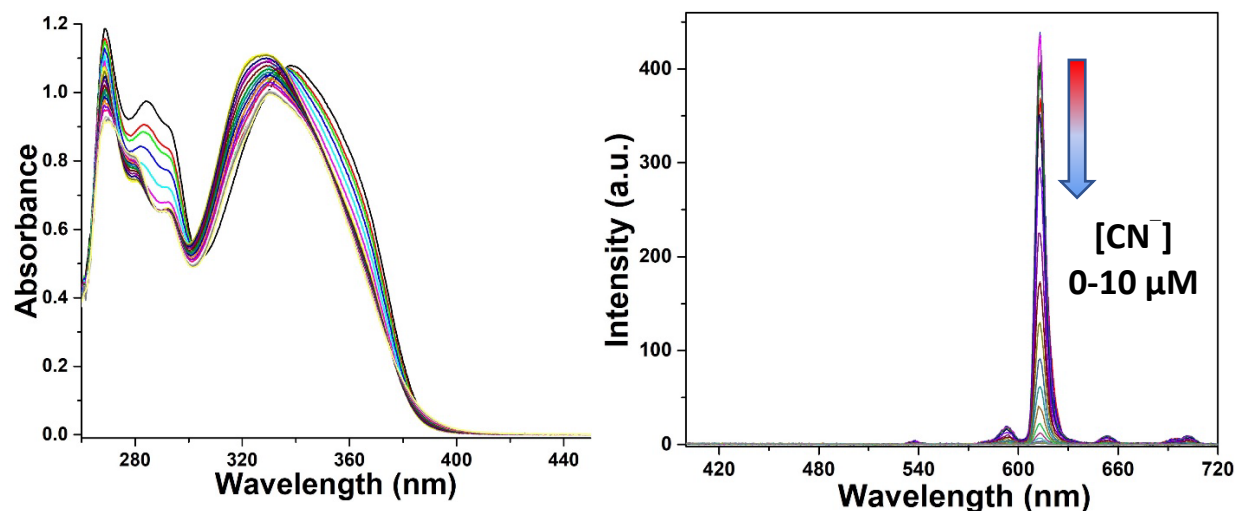

**Fig. S12** Change in absorption spectra (a) and in the PL spectra (b) of **Eu.1** (2.5 μM) in MeCN with the increasing concentration of [CN<sup>-</sup>] (0-10 μM) in H<sub>2</sub>O observed at characteristic emission bands of Eu(III) ion ( $^5D_0 \rightarrow ^7F_{J=0,1,2,3,4}$ ),  $\lambda_{\text{ex}} = 340$  nm, ex. and em. slit width 5 nm.

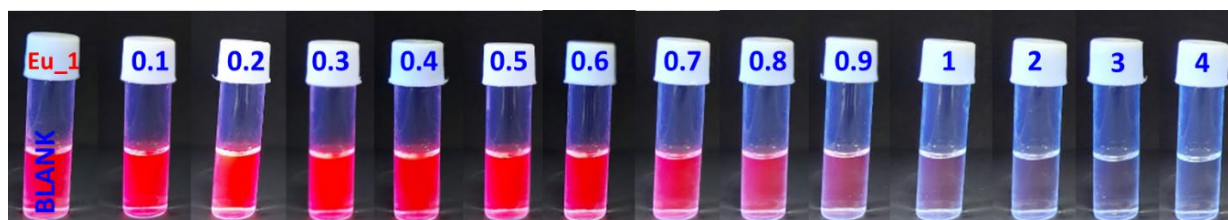

**Fig. S13** Change in the emission of **Eu.1** (10 μM) in MeCN with the increasing concentration of [CN<sup>-</sup>] (0-40 μM, 0-4 equiv.) in H<sub>2</sub>O as seen from the naked eye under UV light (365 nm).

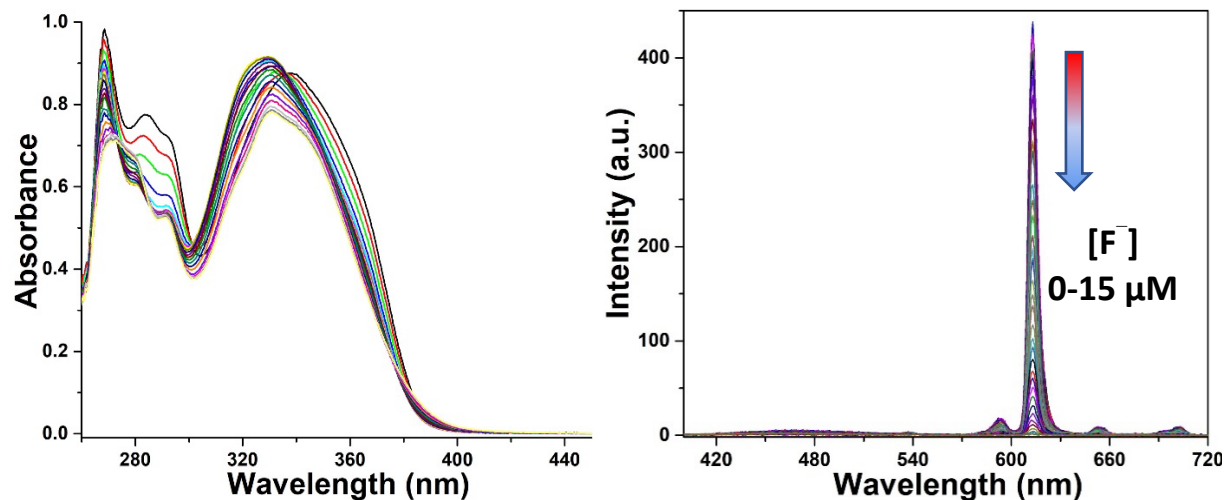

**Fig. S14** Change in absorption spectra (a) and in the PL spectra (b) of **Eu.1** (2.5 μM) in MeCN with the increasing concentration of [F<sup>-</sup>] (0-15 μM) in H<sub>2</sub>O observed at characteristic emission bands of Eu(III) ion ( $^5D_0 \rightarrow ^7F_{J=0,1,2,3,4}$ ),  $\lambda_{\text{ex}} = 340$  nm, ex. and em. slit width 5 nm.

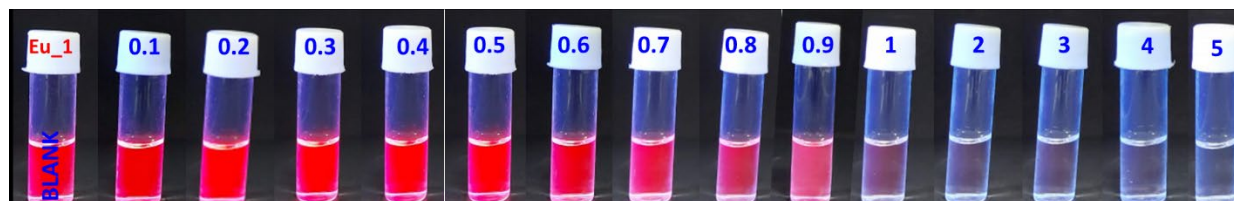

**Fig. S15** Change in the emission of **Eu.1** (10 μM) in MeCN with the increasing concentration of [F<sup>-</sup>] in H<sub>2</sub>O (0-50 μM, 0-5 equiv.) as seen from the naked eye under UV light (365 nm).

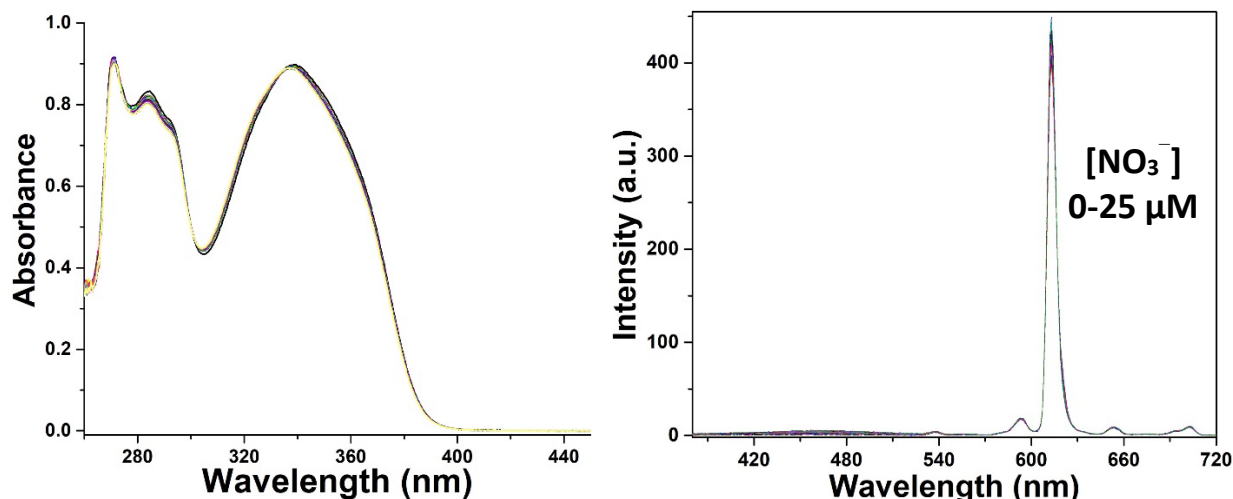

**Fig. S16** Change in absorption spectra (a) and in the PL spectra (b) of **Eu.1** (2.5  $\mu\text{M}$ ) in MeCN with the increasing concentration of  $[\text{NO}_3^-]$  (0-25  $\mu\text{M}$ , 0-10 equiv.) in  $\text{H}_2\text{O}$  observed at characteristic emissions of Eu(III) ( ${}^5D_0 \rightarrow {}^7F_{J=0,1,2,3,4}$ ),  $\lambda_{\text{ex}} = 340 \text{ nm}$ , ex. and em. slit width 5 nm.

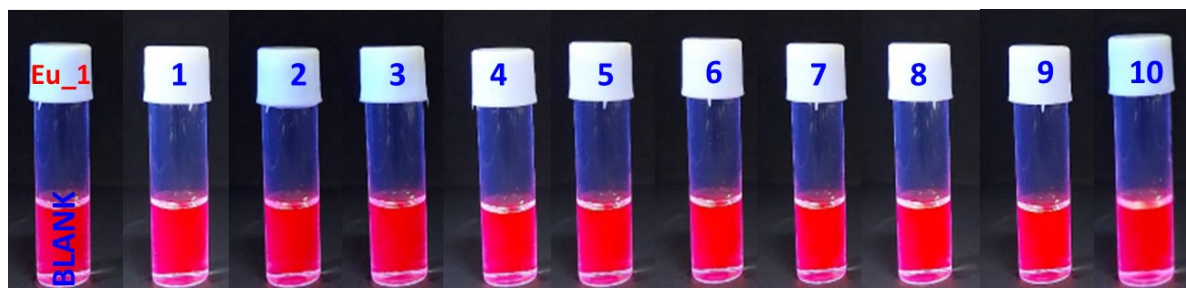

**Fig. S17** Change in the emission of **Eu.1** (10  $\mu\text{M}$ ) in MeCN with the increasing concentration of  $[\text{NO}_3^-]$  in  $\text{H}_2\text{O}$  (0-100  $\mu\text{M}$ , 0-10 equiv.) as seen from the naked eye under UV light (365 nm).

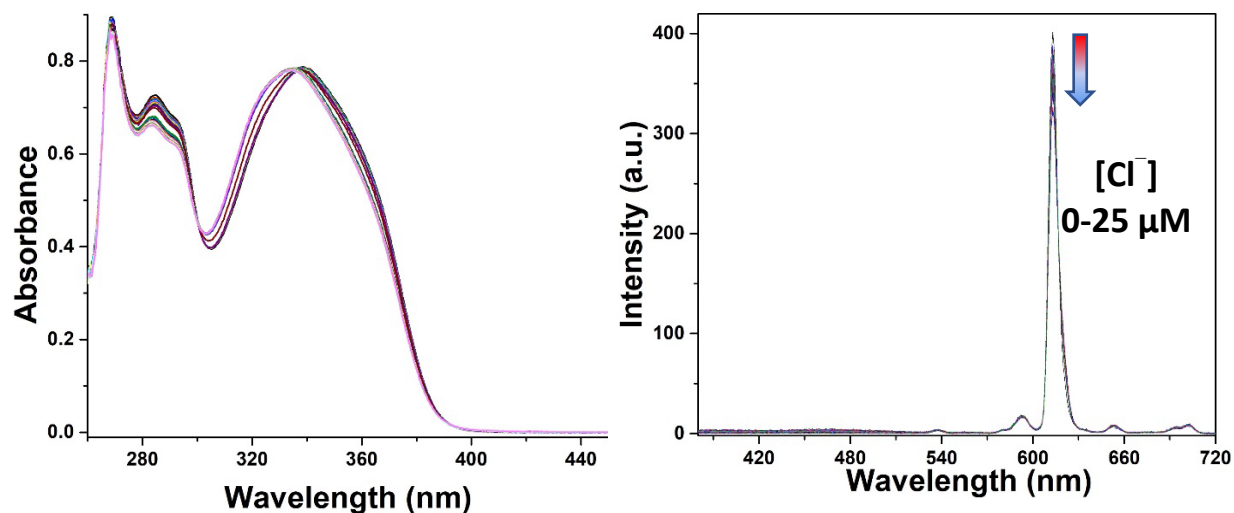

**Fig. S18** Change in absorption spectra (a) and in the PL spectra (b) of **Eu.1** (2.5  $\mu\text{M}$ ) in MeCN with the increasing concentration of  $[\text{Cl}^-]$  (0-25  $\mu\text{M}$ , 0-10 equiv.) in  $\text{H}_2\text{O}$  observed at characteristic emission bands of Eu(III) ion ( $^5D_0 \rightarrow ^7F_{J=0,1,2,3,4}$ ),  $\lambda_{\text{ex}} = 340 \text{ nm}$ , ex. and em. slit width 5 nm.

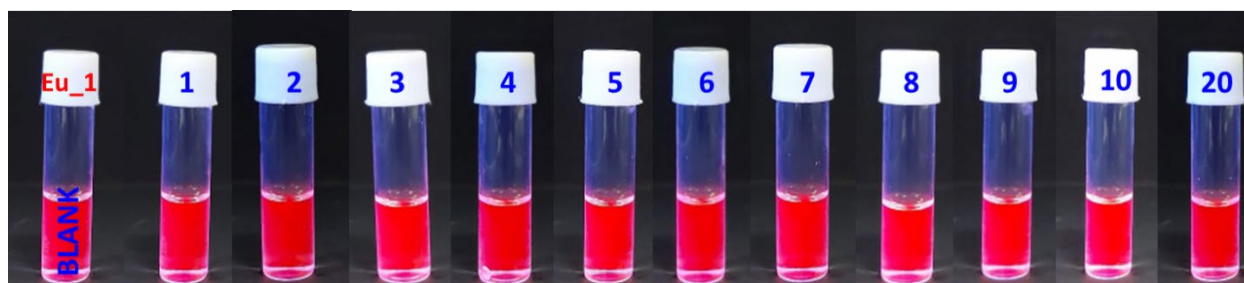

**Fig. S19** Change in the emission of **Eu.1** (10  $\mu\text{M}$ ) in MeCN with the increasing concentration of  $[\text{Cl}^-]$  in  $\text{H}_2\text{O}$  (0-200  $\mu\text{M}$ , 0-20 equiv.) as seen from the naked eye under UV light (365 nm).

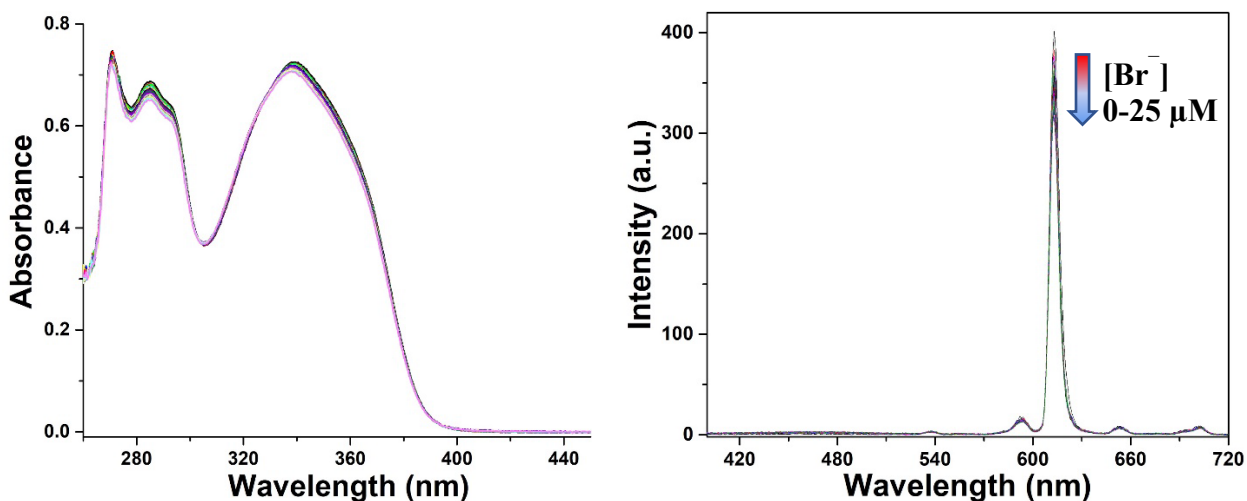

**Fig. S20** Change in absorption spectra **(a)** and in the PL spectra **(b)** of **Eu.1** (2.5 μM) in MeCN with the increasing concentration of [Br<sup>-</sup>] (0-25 μM, 0-10 equiv.) in H<sub>2</sub>O observed at characteristic emission bands of Eu(III) ( $^5D_0 \rightarrow ^7F_{J=0,1,2,3,4}$ ),  $\lambda_{ex} = 340$  nm, ex. / em. slit width 5 nm.

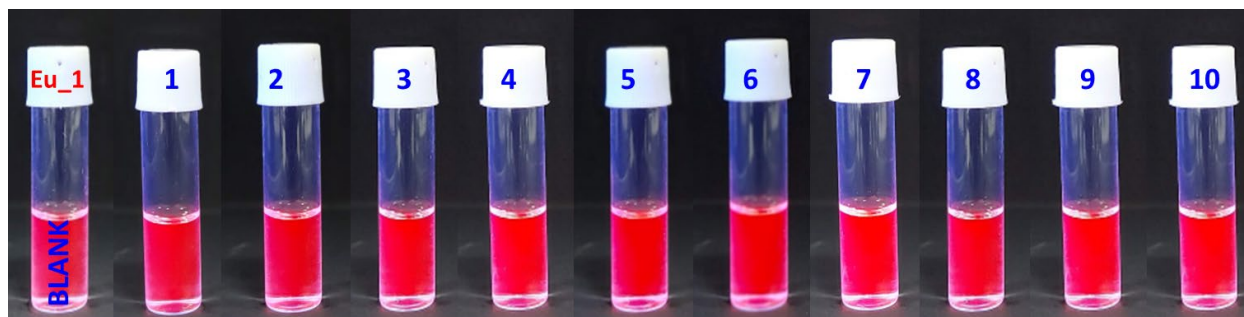

**Fig. S21** Change in the emission of **Eu.1** (10 μM) in MeCN with the increasing concentration of [Br<sup>-</sup>] (0-100 μM, 0-10 equiv.) in H<sub>2</sub>O as seen from the naked eye under UV light (365 nm).

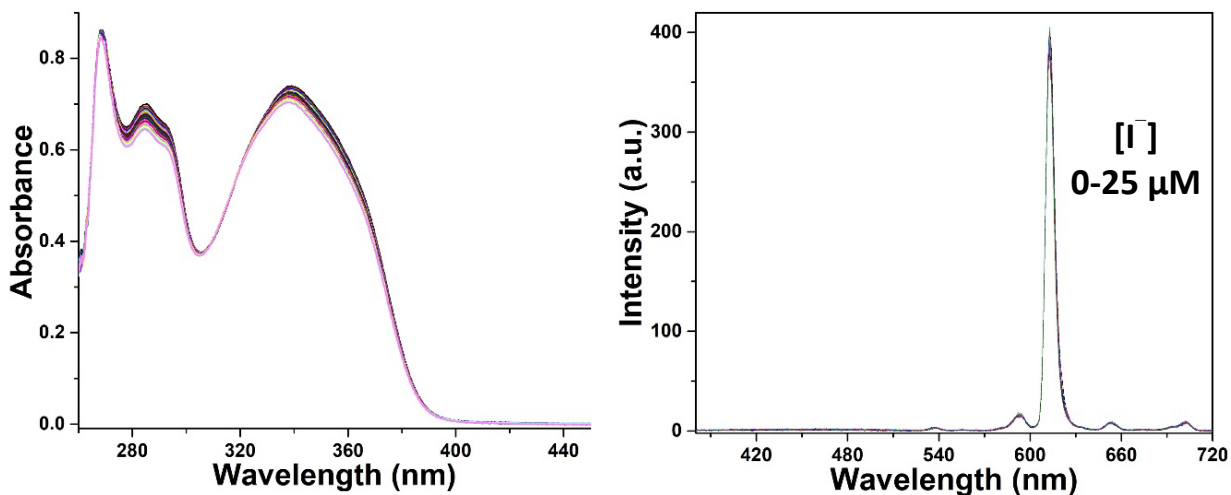

**Fig. S22** Change in absorption spectra **(a)** and in the PL spectra **(b)** of **Eu.1** (2.5  $\mu\text{M}$ ) in MeCN with the increasing concentration of  $[\text{I}^-]$  (0-25  $\mu\text{M}$ , 0-10 equiv.) in  $\text{H}_2\text{O}$  observed at characteristic emission bands of Eu(III) ion ( $^5D_0 \rightarrow ^7F_{J=0,1,2,3,4}$ ),  $\lambda_{\text{ex}} = 340 \text{ nm}$ , ex. and em. slit width = 5 nm.

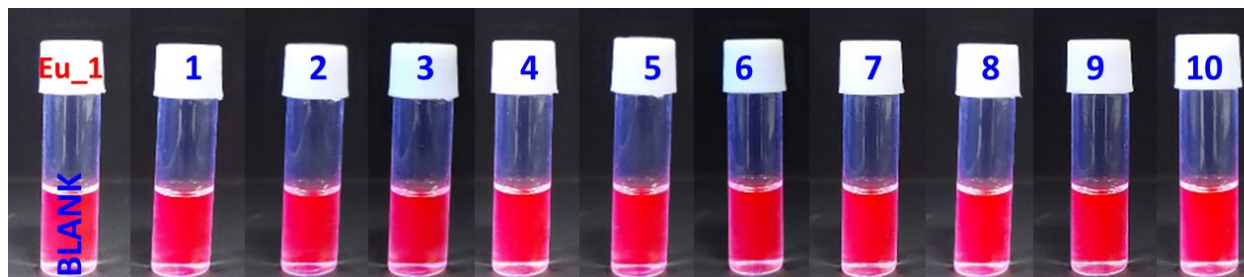

**Fig. S23** Change in the emission of **Eu.1** (10  $\mu\text{M}$ ) in MeCN with the increasing concentration of  $[\text{I}^-]$  (0-100  $\mu\text{M}$ , 0-10 equiv.) in  $\text{H}_2\text{O}$  as seen from the naked eye under UV light (365 nm).

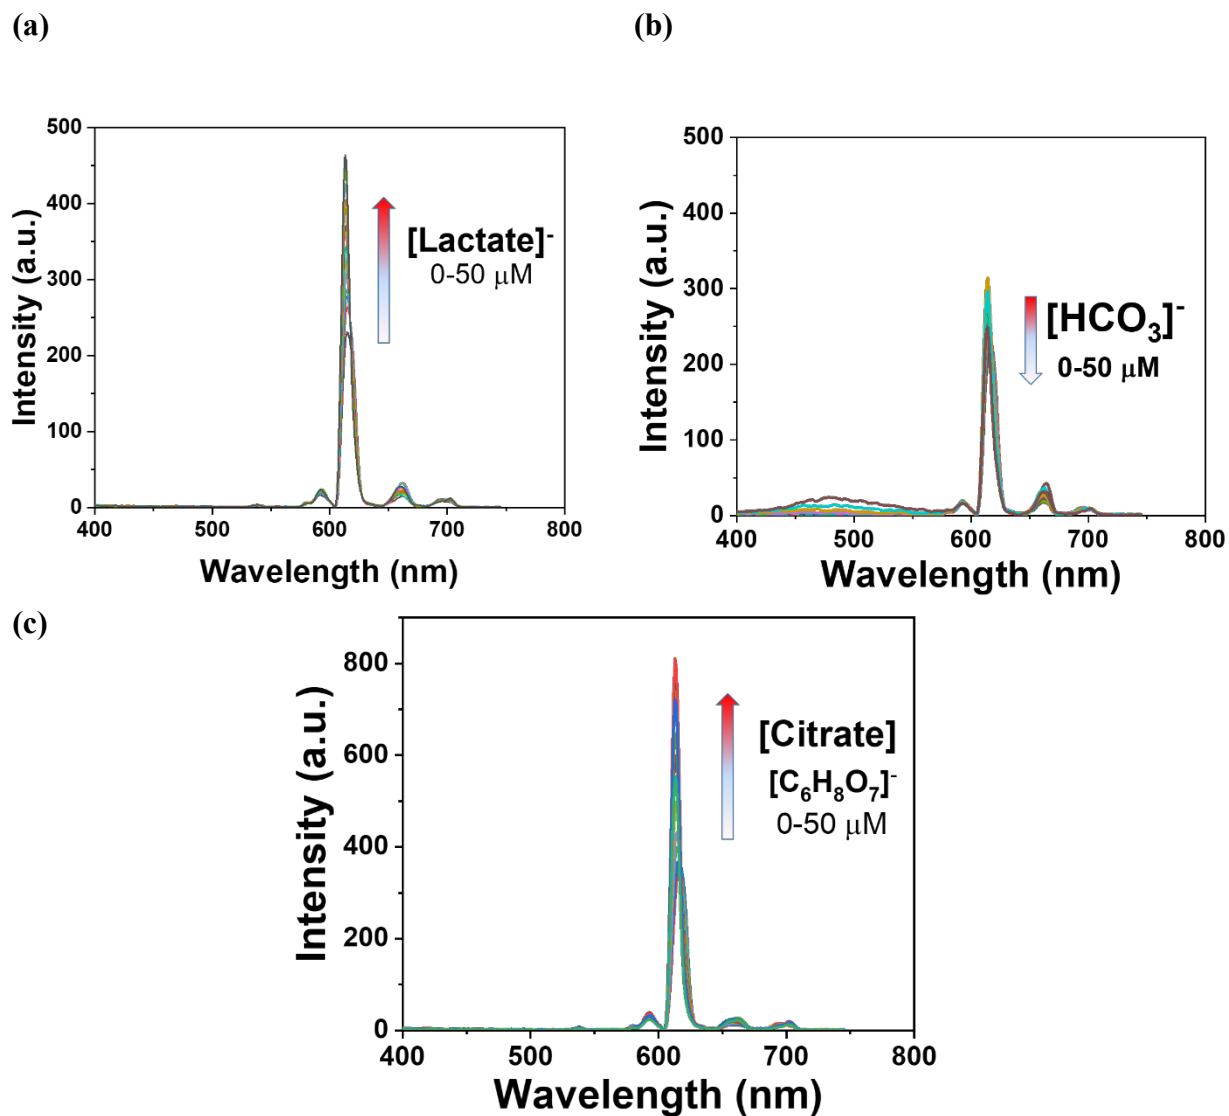

**Fig. S24** Change in emission spectra of **Eu.1** (2.5  $\mu\text{M}$ ) on continuous addition of (a) lactate (b) bicarbonate  $[\text{HCO}_3^-]$ , and (c) citrate (0-50  $\mu\text{M}$  in MeCN:Water-75:25 (v/v), 0-20 equiv.) observed at characteristic emission bands of Eu(III) ion ( ${}^5D_0 \rightarrow {}^7F_{J=0,1,2,3,4}$ ),  $\lambda_{\text{ex.}} = 340 \text{ nm}$ , ex. and em. slit width 5 nm.

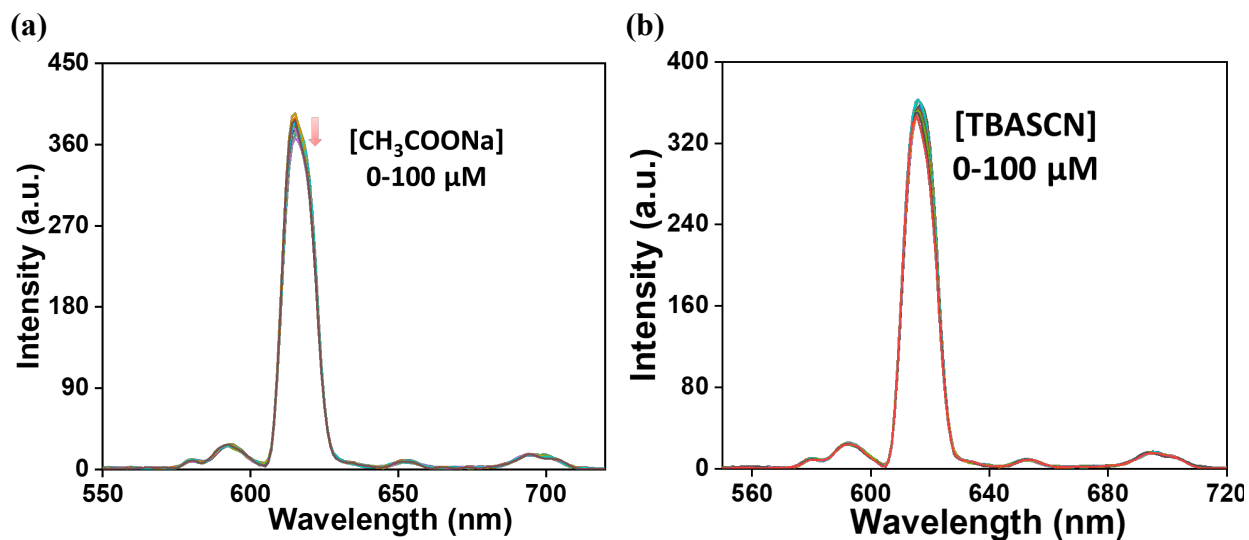

**Fig. S25** Change in emission spectra of **Eu.1** (2.5 μM) on continuous addition of **(a)** CH<sub>3</sub>COONa **(b)** TBASCN (in MeCN:Water=75:25 v/v) observed (0-100 μM) at characteristic emission bands of Eu(III) ion ( $^5D_0 \rightarrow ^7F_{J=0,1,2,3,4}$ ),  $\lambda_{\text{ex.}} = 340$  nm, ex. and em. slit width = 5 nm.

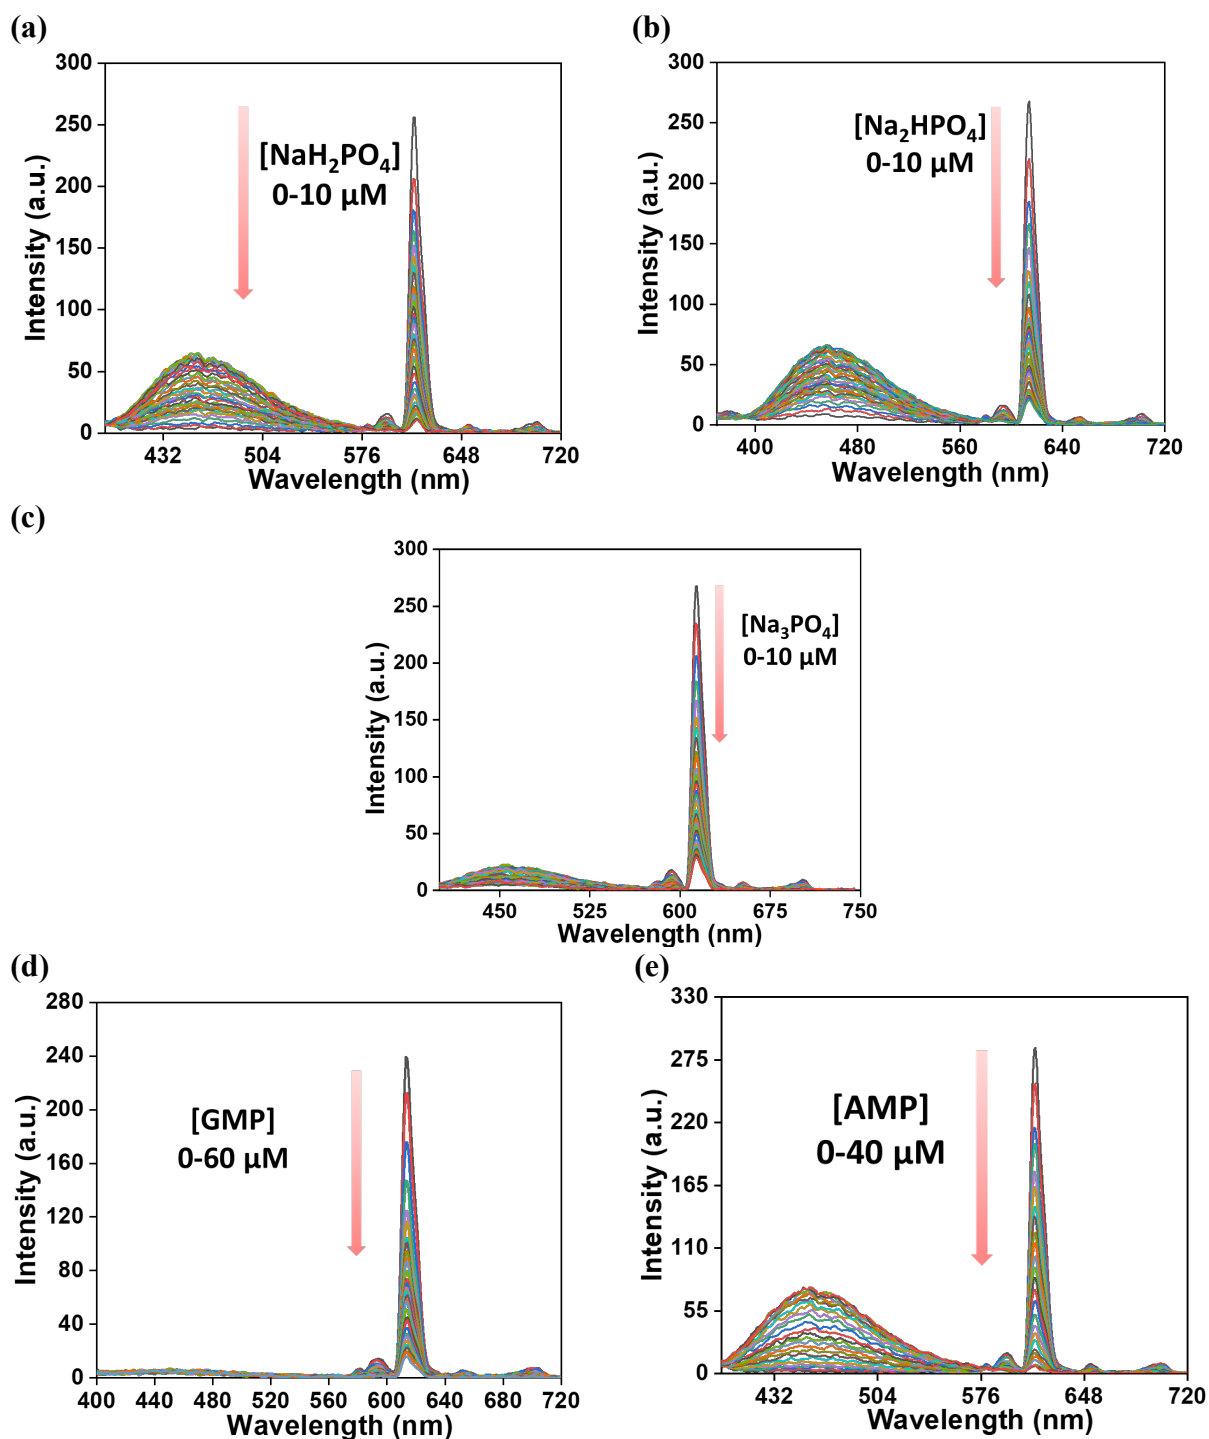

**Fig. S26** Change in emission spectra of **Eu.1** (2.5  $\mu\text{M}$ ) on continuous addition of (a)  $\text{NaH}_2\text{PO}_4$  (b)  $\text{Na}_2\text{HPO}_4$  (c)  $\text{Na}_3\text{PO}_4$  (0-10  $\mu\text{M}$ ) and nucleotide phosphates (d) GMP (0-60  $\mu\text{M}$ ) (e) AMP (0-40  $\mu\text{M}$ ) as representative physiological phosphates in MeCN:Water-50:50, observed at characteristic emission bands of **Eu(III)** ion ( $^5D_0 \rightarrow ^7F_{J=0,1,2,3,4}$ ),  $\lambda_{\text{ex.}} = 340$  nm, ex. and em. slit width 5 nm.

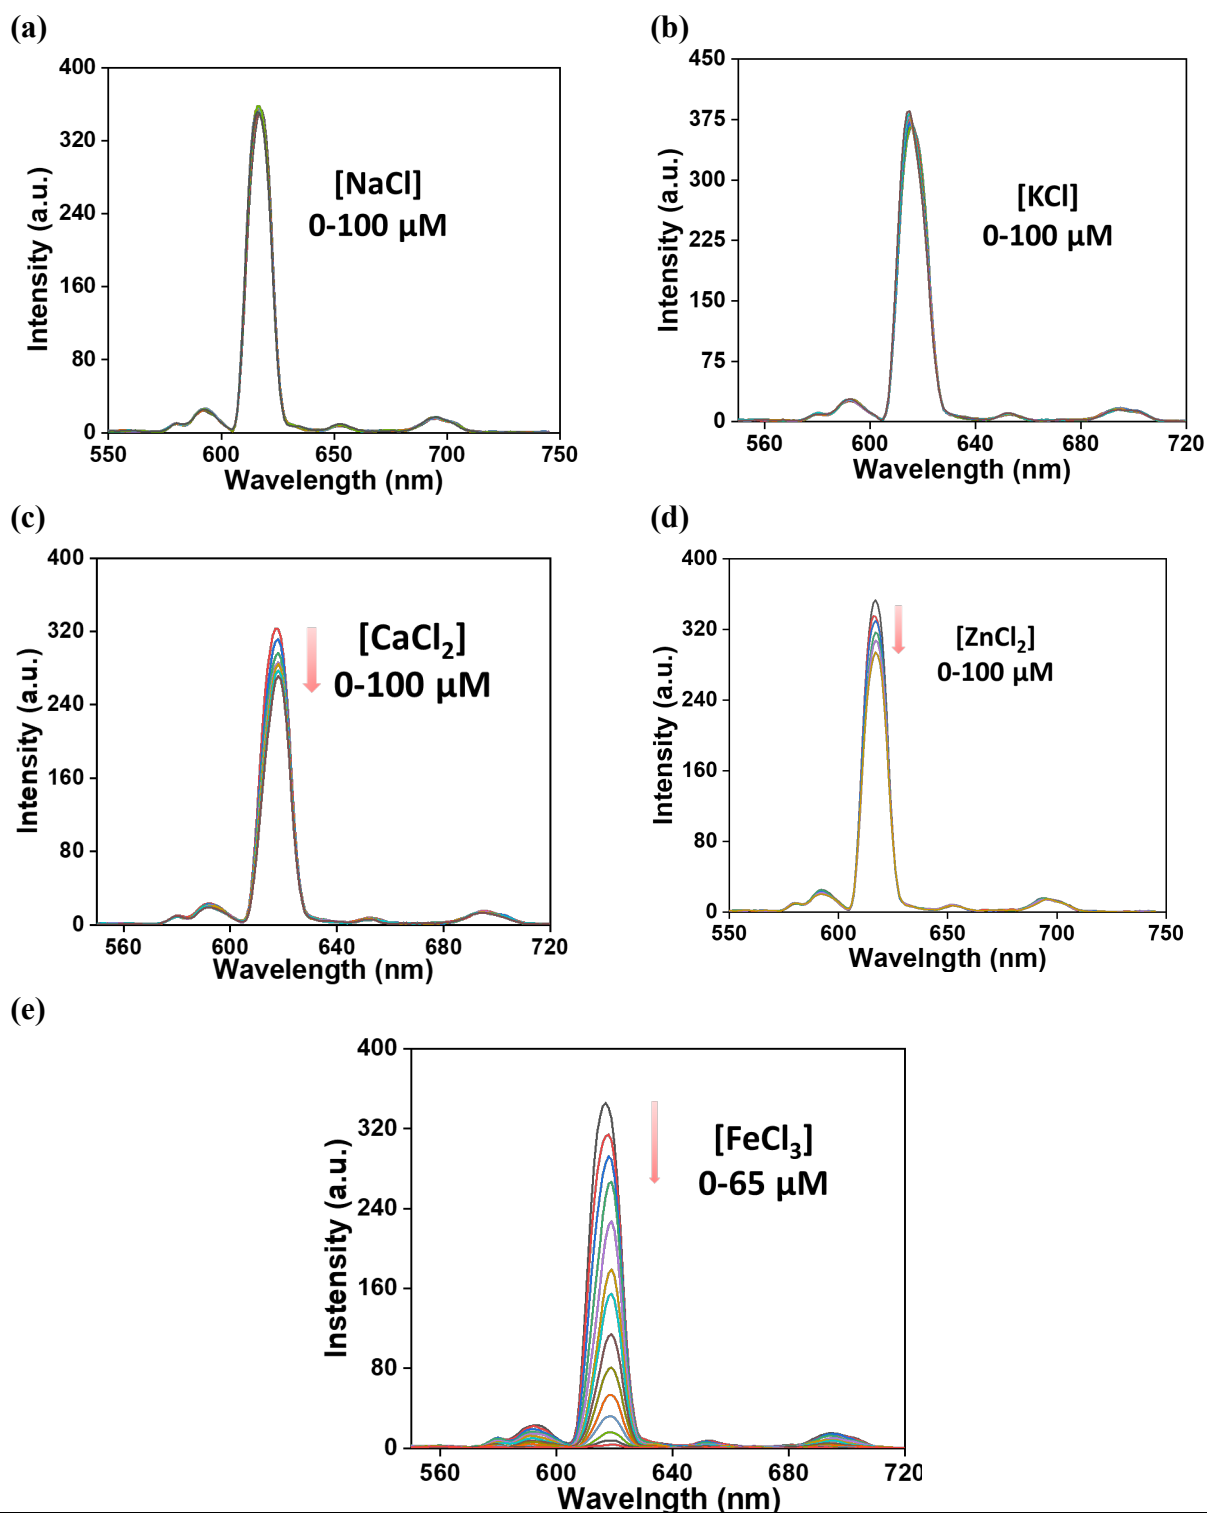

**Fig. S27** Changes in emission spectra of **Eu.1** (2.5  $\mu\text{M}$ ) on continuous addition of (a) NaCl (b) KCl (c)  $\text{CaCl}_2$  (d)  $\text{ZnCl}_2$  (e)  $\text{FeCl}_3$  (MeCN:Water–75:25) observed at characteristic emission bands of Eu(III) ion ( $^5D_0 \rightarrow ^7F_{J=0,1,2,3,4}$ ),  $\lambda_{\text{ex.}} = 340$  nm, ex. and em. slit width 5 nm.

(a)

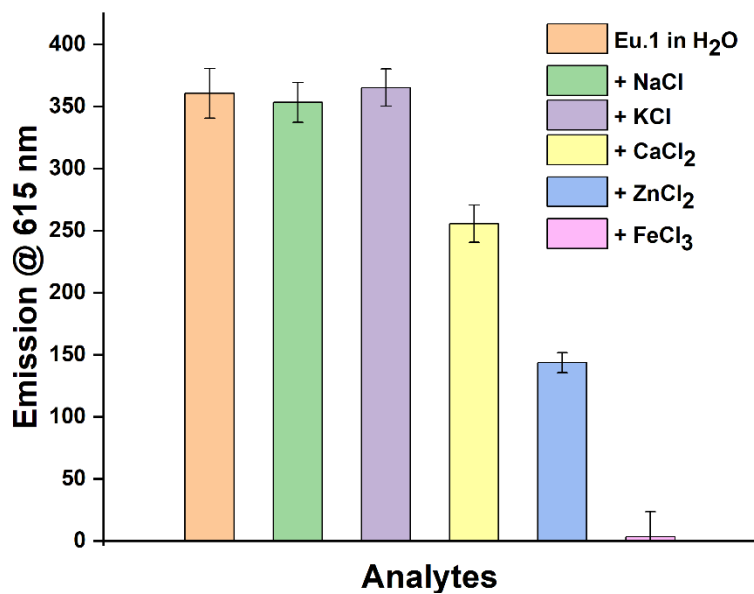

**Fig. S28** Bar plot representing the emission intensity at 615 nm from **Eu.1** on addition of different metal ions (0-75  $\mu$ M, each) in MeCN:Water (75:25 v/v),  $\lambda_{\text{ex.}} = 340$  nm, ex. and em. slit width 5 nm.

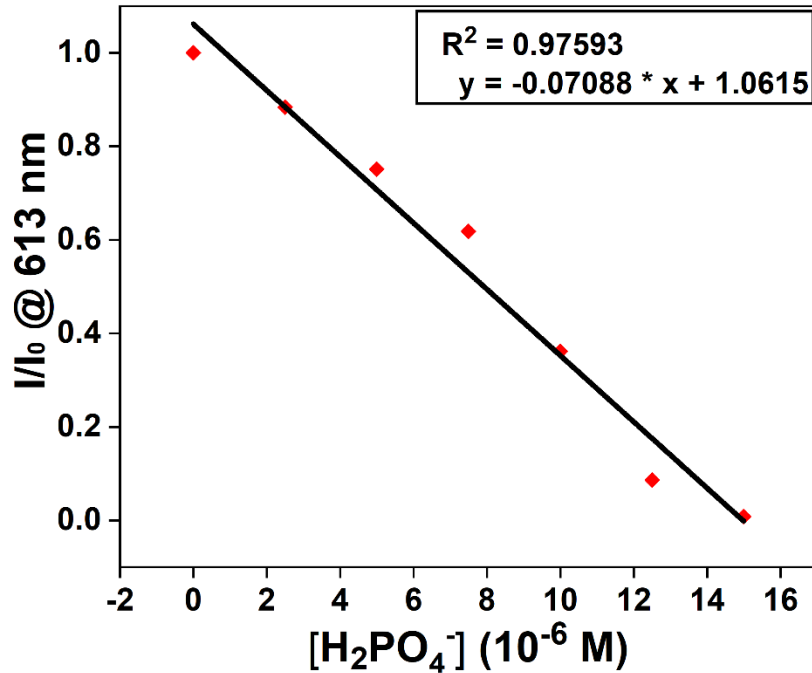

**Fig. S29** Plot for the calculation of limit of detection (LOD) of phosphate ion plotted for 613 nm with the continuous addition of the H<sub>2</sub>PO<sub>4</sub><sup>-</sup>.

**Limit of Detection Calculations:**

**LOD = 3.3  $\sigma/s$**

Where,  $\sigma$  is the standard deviation of the regression line and  $s$  is the slope of the curve.

For **Eu.1**,  $s = 0.07088$  and  $\sigma = 0.38748$

**LOD = 18 ppb**

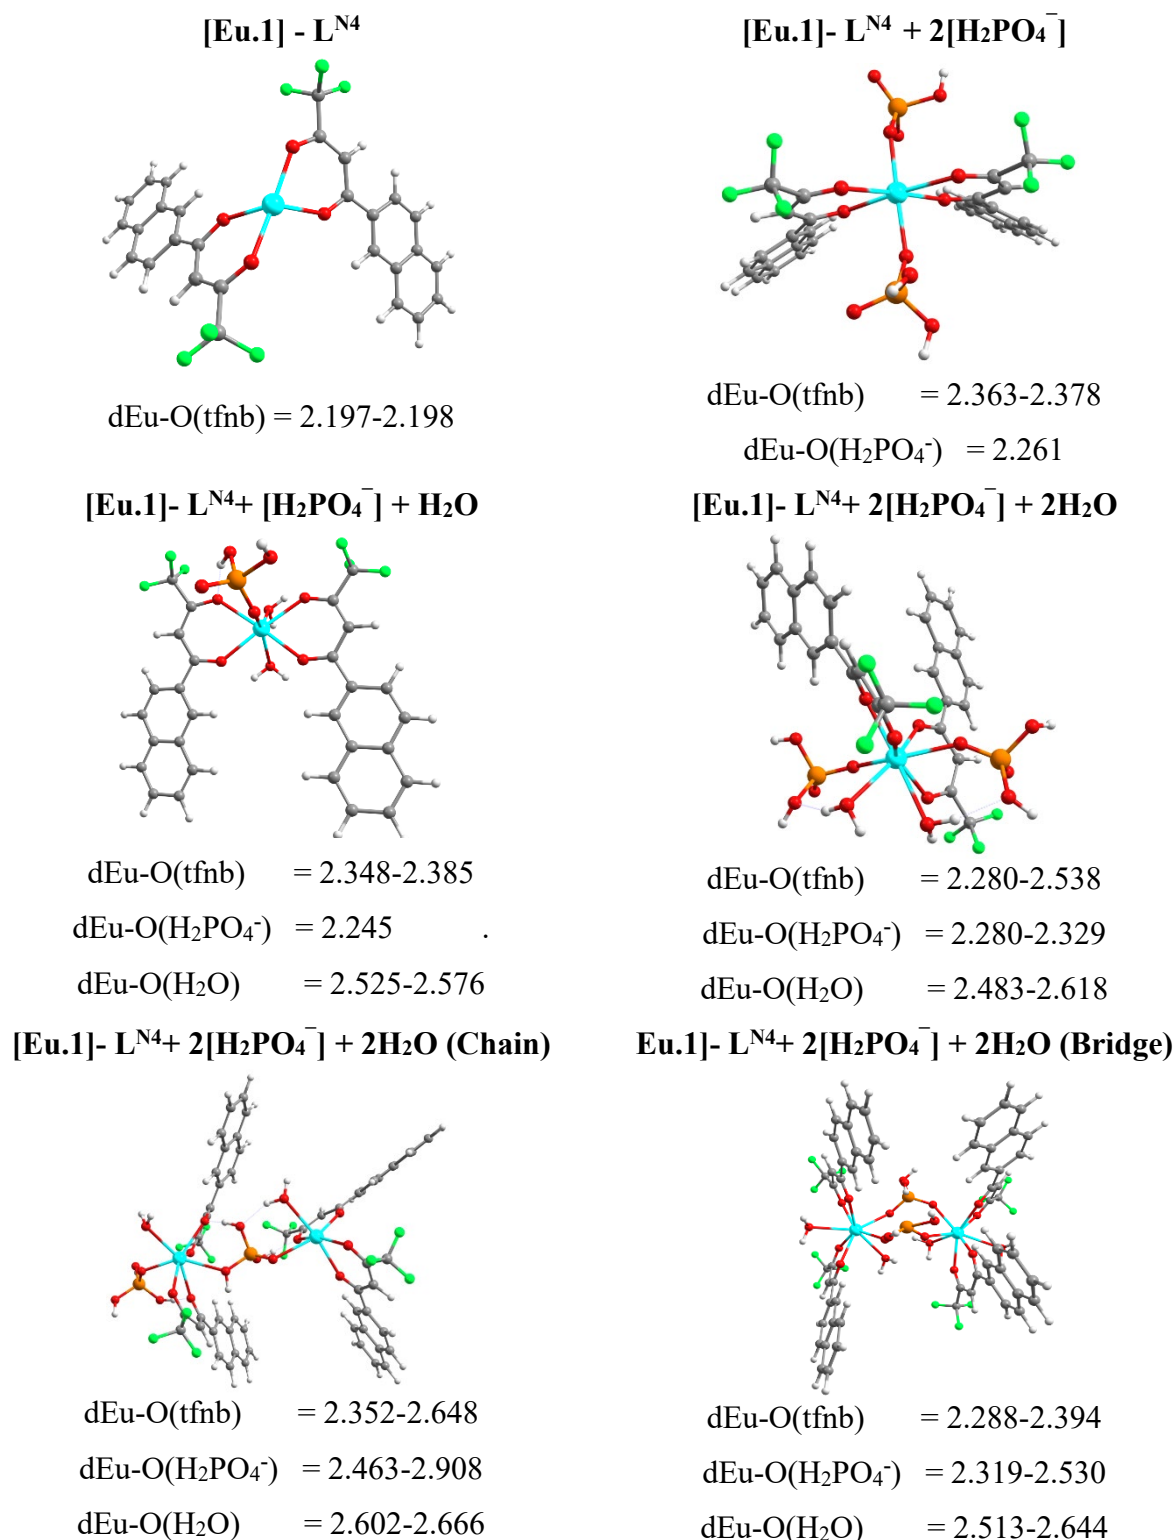

**Fig. S30** DFT-optimized molecular structures of **Eu.1** bound to phosphate(s) in different binding modes/speciations (after dissociation of L<sup>N4</sup>). Some general bond lengths (theoretical) have been reported below the structures.

### S31. Quantum Yield:

The quantum yield ( $\phi_x$ ) was calculated by using relative quantum yield measurement using the formulae:

$$\phi_x = \left(\frac{A_R}{A_X}\right) \left(\frac{E_x}{E_R}\right) \left(\frac{n_x}{n_R}\right)^2 \phi_R$$

Where  $\Phi$  is the luminescence quantum yield,  $A$  is the absorbance at the excitation wavelength,  $E$  is the area under the corrected emission curve (expressed in number of photons),  $n$  is the refractive index of the solvents used. The subscripts  $R$  and  $X$  refer to the reference and the unknown samples respectively. The ideal absorbance value was kept around 0.2 to keep the emission intensity directly proportional to the concentration of the analyte. Cs<sub>3</sub>[Eu(DPA)<sub>3</sub>] was used as an internal standard with  $\Phi_R = 13.5\% \pm 1.5\%$  in 0.1 M tris buffer at pH 7.0.

Area Under the curve for Reference = 1985.53

Area under the curve for **Eu.1** = 1484.54

$$n_x = 1$$

$$n_R = 1.3$$

$$\phi_x = 5.97 \pm 1.5 \text{ in water at } \lambda_{ex.} = 279 \text{ nm.}$$
